# Supplementary material
Source: PubMed Central journal article supplement (PMC4313309)
Supplement: JCM.02537-14_zjm999093838so1.pdf [file JCM.02537-14_zjm999093838so1.pdf]

1 Supplementary Text S1. Methods and materials

2 For the gram-negative bacteria, five to ten isolated colonies from blood agar medium were  
3 transferred to purified water in a 1.5 ml eppendorf tube and subsequently incubated for 10  
4 min at 95 °C, and centrifuged briefly. DNA extraction was carried out with a Magna Pure  
5 Compact system (Roche Diagnostics Scandinavia AB, Bromma, Sweden) according to the  
6 manufacturer's instructions, and the DNA concentration was measured by use of a UV/Vis  
7 spectrophotometer (Tehtum Lab AB, Sweden). The DNA concentration range was kept at  
8 100 to 500 ng/μl. For the gram-positive bacteria, an agar plate with confluent growth of an  
9 isolate was flooded with 1 mL of PBS. This step was repeated two times. The eluate was  
10 centrifuged at 14 000 x g for 10 min. The supernatant was discarded and 800 μl MagNA  
11 Pure Bacteria Lysis Buffer (Roche Diagnostics Scandinavia AB, Bromma, Sweden) and 0.8 g  
12 of 0.5 mm zirconia/silica beads (BioSpec Products Inc, Bartlesville, Oklahoma, USA) was  
13 added. The samples were homogenized in a mini-beadbeater (BioSpec Products Inc,  
14 Bartlesville, Oklahoma, USA) for 30 s and centrifuged at 10 000 x g for 3 min after which  
15 400 μl supernatant was transferred and DNA extraction was carried out with a Magna Pure  
16 Compact system (Roche Diagnostics Scandinavia AB, Bromma, Sweden) according to the  
17 manufacturer's instructions. The DNA concentration was measured by use of a UV/Vis  
18 spectrophotometer (Tehtum Lab AB, Sweden) and the concentration range was kept at 15 to  
19 30 ng/μl. DNA concentration was normalized for all samples and up to 1 μg DNA was used  
20 for the cleavage reaction as described previously (1). Subsequent PCR was carried out in a  
21 reaction mixture with 2 μl template i.e. ligation mix, as previously described (1). Real-time  
22 PCR with HRM (Rotor-Gene 6000; Corbett Research, Tehtum Lab AB, Sweden) was  
23 optimized for each species as described in Table S1. Each isolate was analysed in duplicate on  
24 at least three different occasions. Following LMqPCR HRMA, the DNA products were  
25 analysed by agarose gel electrophoresis (E-gel EX, 2%; LifeTechnologies, Sweden) according

26 to the instructions provided by the manufacturer. DNA banding patterns were analysed by use  
27 of GelClust ([www.bmsu.ac.ir/Services/Event/View.aspx?Oid=1766](http://www.bmsu.ac.ir/Services/Event/View.aspx?Oid=1766)). The Dice similarity  
28 coefficient and UPGMA were used for cluster analysis. For PFGE, bacterial isolates and  
29 control strains were analyzed using the restriction enzyme *XbaI* for *K. pneumoniae* and *E.*  
30 *cloacae* (2), *SpeI* for *P. aeruginosa* (3), *ApaI* for *Acinetobacter* spp. (4) and *SmaI* for *S.*  
31 *aureus* and *E. faecium* (5, 6). *XbaI*-digested DNA from *Salmonella enterica* serovar  
32 Braenderup H9812 ([www.cdc.gov/pulsenet](http://www.cdc.gov/pulsenet)) was included as a normalization standard when  
33 analyzing *K. pneumoniae*, *E. cloacae* and *P. aeruginosa*, and *S. aureus* NCTC8325 for the  
34 gram-positive bacteria and *Acinetobacter* spp. DNA banding patterns were analysed by use of  
35 BioNumerics version 6.0 (Applied Maths NV, Belgium). The Dice similarity coefficient and  
36 UPGMA were used for cluster analysis; in general, isolates with >97 % similarity were  
37 defined as identical, isolates with 90-97 % similarity as being closely related, and isolates  
38 with <90 % similarity defined as unrelated.

39

#### 40 *Algorithm for evaluation of the HRMA analysis to discriminate between isolates*

41 Several aspects were evaluated to determine if two or more HRM curves were different within  
42 the same run (please see example for *Enterobacter* spp. in Supplementary figure 1-2). First, to  
43 determine similarities objectively, an algorithm previously developed (1) was applied.  
44 Second, the whole HRM curves (df/dt plotted against temperature) were compared to each  
45 other by overlaying them and inspecting them visually. Third, the same approach was used to  
46 the normalized curves (normalized fluorescence plotted against temperature). Last, the curve  
47 representing the isolate in question was determined as different from another isolate if the  
48 difference curve (normalized fluorescence minus isolate of the control plotted against  
49 temperature) was beyond  $\pm 3.5$  U for *E. faecium* (Fig 1C),  $\pm 5$  U for *S. aureus*,  $\pm 3$  U *K.*

50 *pneumoniae*,  $\pm 3$  U for *A. baumannii* (Fig 1D),  $\pm 5$  U *P. aeruginosa* and  $\pm 3$  U *E. cloacae*. The  
51 definition of U is % difference between the normalized curves calculated by the RotorGene  
52 software. The cut-off for the  $\Delta U$  were determined empirically in a pilot stage before the  
53 blinded analysis was initiated. For isolates within these limits, the curve shape was also  
54 considered in relation to the reference, i.e. how much the curve differed from the reference at  
55 each point along the entire X-axis. There were 11 isolates deviating from the set U-values  
56 (data not shown), mostly depending on shifts between identical curves resulting in similar  
57 curves lying outside these values, but also isolates with clearly different melting curves that fit  
58 within the  $\Delta U$  cut-off. Such isolates were subjectively evaluated and not subjected to U-value  
59 analysis.
