# Supplementary material
Source: PubMed Central journal article supplement (PMC4313309)
Supplement: JCM.02537-14_zjm999093838so2.pdf [file JCM.02537-14_zjm999093838so2.pdf]

1 Table S1. qPCR HRM settings for the different species.

| Species                        | pPCR HRM settings |           |          |                                |          |                              |           |          |                |
|--------------------------------|-------------------|-----------|----------|--------------------------------|----------|------------------------------|-----------|----------|----------------|
|                                | Hold              | Hold      | Cycles 1 |                                | Cycles 2 |                              | Hold      | Hold     | Range for HRMA |
| <i>Enterococcus faecium</i>    | 72°C 7min         | 95°C 5min | 10x      | <b>78°C</b> 60s<br>72°C 120s   | 15x      | <b>82°C</b> 60s<br>72°C 120s | 72°C 5min | 50°C 30s | 76-84°C        |
| <i>Staphylococcus aureus</i>   | 72°C 7min         | 95°C 5min | 10x      | <b>76°C</b> 60s<br>72°C 120s   | 20x      | <b>80°C</b> 60s<br>72°C 120s | 72°C 5min | 50°C 30s | 75-81°C        |
| <i>Klebsiella pneumoniae</i>   | 72°C 7min         | 95°C 5min | 10x      | <b>80°C</b> 60s<br>72°C 120s   | 15x      | <b>84°C</b> 60s<br>72°C 120s | 72°C 5min | 50°C 30s | 78-86°C        |
| <i>Acinetobacter baumannii</i> | 72°C 7min         | 95°C 5min | 8x       | <b>76°C</b> 60s<br>72°C 120s   | 18x      | <b>80°C</b> 60s<br>72°C 120s | 72°C 5min | 50°C 30s | 74-82°C        |
| <i>Pseudomonas aeruginosa</i>  | 72°C 7min         | 95°C 5min | 22x      | <b>87.2°C</b> 60s<br>72°C 120s |          |                              | 72°C 5min | 50°C 30s | 83-90°C        |
| <i>Enterobacter cloacae</i>    | 72°C 7min         | 95°C 5min | 10x      | <b>80°C</b> 60s<br>72°C 120s   | 18x      | <b>84°C</b> 60s<br>72°C 120s | 72°C 5min | 50°C 30s | 76-86°C        |

2  
3 Table legend. The first hold is to release unligated HINDLIG oligonucleotides (7) and to fill  
4 in the single-stranded ends and create templates. The second hold is for initial denaturation  
5 and enzyme activation followed by cycling optimized for each species. After the last cycle  
6 prior to HRMA, samples were incubated at 50° C for 30 s to allow single-stranded DNA to  
7 become double-stranded. Melting-curve analysis was performed by using high resolution melt  
8 analysis at different temperature-spans depending on species as indicated and denaturation  
9 temperature (T<sub>D</sub>) in the cycles (indicated with bold style), with stepwise increases of 0.05°C.

10 Figure S1. LMqPCR HRMA results for *E. cloacae*, all graphs included. In A complete  
11 melting curves for all isolates (in duplicates) are visualized plotting  $df/dt$  against temperature  
12 ( $^{\circ}\text{C}$ ). These melting curves were evaluated using the algorithm (1) and by subjective  
13 evaluation using visual inspection of the whole curves. In B normalized fluorescence is  
14 plotted against temperature for all isolates ( $^{\circ}\text{C}$ ) (in duplicates). These curves were used to  
15 subjectively study shifts between isolates. In C-L isolate EnC01-EnC10 respectively, is set as  
16 reference, plotting the difference to all other isolates enabling clustering as  $\pm U$ -value. Isolates  
17 with  $U$ -values  $\leq 3$  (for *E. cloacae*) was considered belonging to the same cluster as the one set  
18 as reference. Analysis of these three different kind of curves was considered together resulting  
19 in a final decision regarding clustering for each isolate.

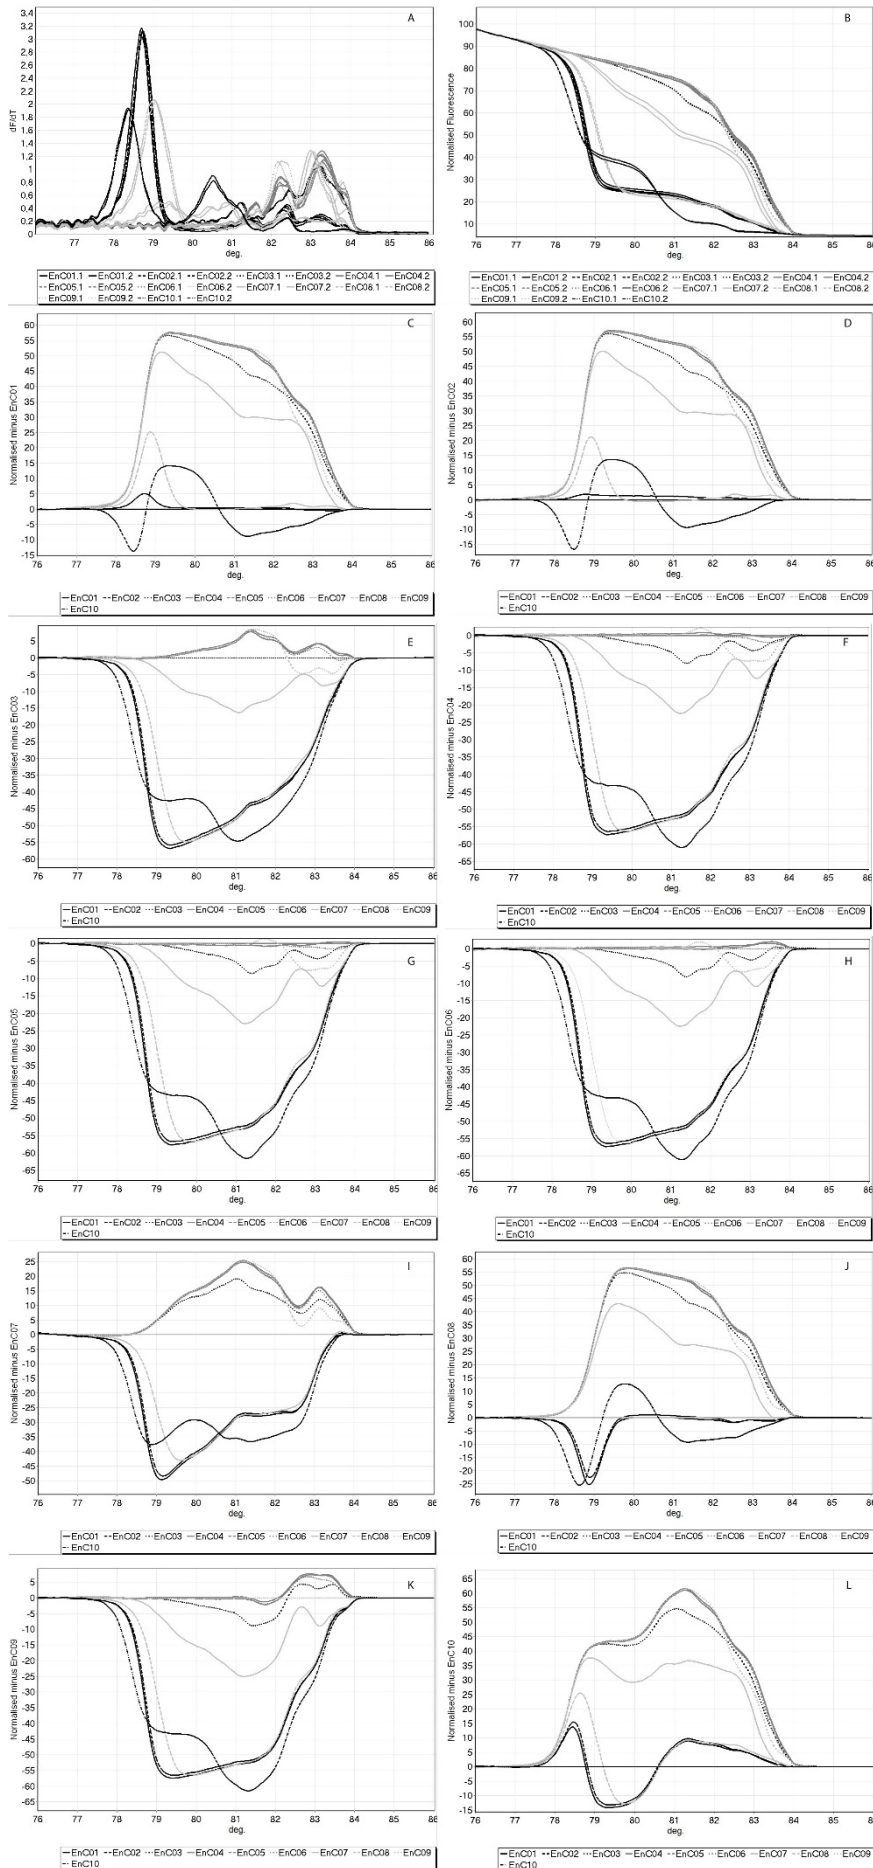

21 Figure S2. Results from agarose gel electrophoresis analysis of *E. cloacae*. For confirmation  
22 of HRMA cluster analysis, the results were compared to results from agarose gel  
23 electrophoresis. EnC01-02 cluster as do EnC04-06. EnC03, 07-10 are unique. M is the marker  
24 E-gel® Low Range Quantitative DNA ladder, 100-2000 bp (Invitrogen, Life Technologies).  
25 Analysis of gels was first done subjectively, then by GelClust using the Dice coefficient and  
26 UPGMA (data not shown).

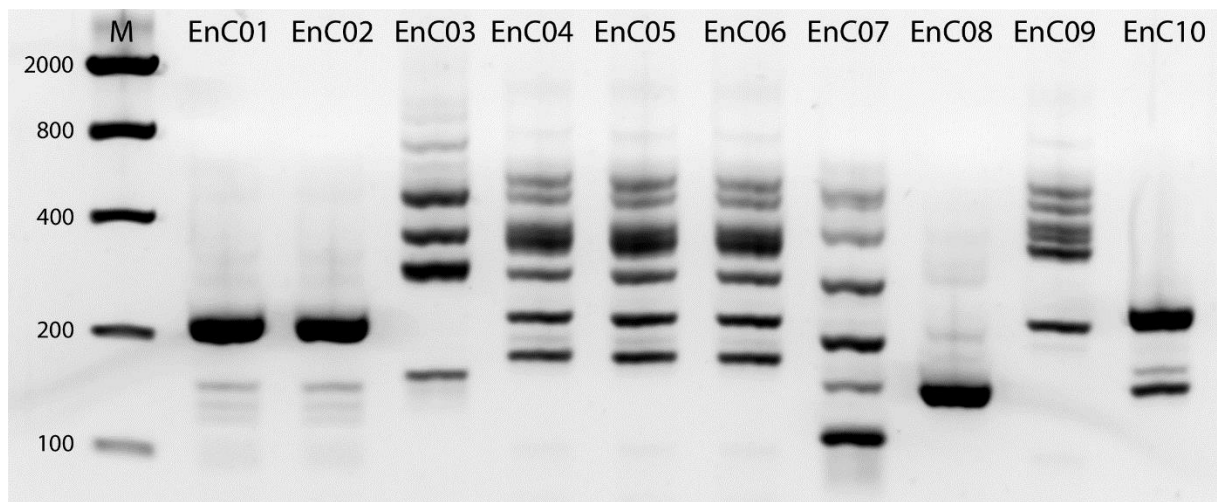

27
