# Supplementary material
Source: PubMed Central journal article supplement (PMC4313309)
Supplement: JCM.02537-14_zjm999093838so3.pdf [file JCM.02537-14_zjm999093838so3.pdf]

## SUPPLEMENTAL REFERENCE LIST

1. **Woksepp H, C Jernberg, M Tarnberg, A Ryberg, A Brolund, M Nordvall, B Olsson-Liljequist, KT Wisell, HJ Monstein, LE Nilsson, and T Schon.** 2011. High-resolution melting-curve analysis of ligation-mediated real-time PCR for rapid evaluation of an epidemiological outbreak of extended-spectrum-beta-lactamase-producing *Escherichia coli*. *J Clin Microbiol* **49**:4032-4039.
2. **Brolund A, S Haeggman, PJ Edquist, L Gezelius, B Olsson-Liljequist, KT Wisell, and CG Giske.** 2010. The DiversiLab system versus pulsed-field gel electrophoresis: characterisation of extended spectrum beta-lactamase producing *Escherichia coli* and *Klebsiella pneumoniae*. *J Microbiol Methods* **83**:224-230.
3. **Johansen HK, SM Moskowitz, O Ciofu, T Pressler, and N Hoiby.** 2008. Spread of colistin resistant non-mucoid *Pseudomonas aeruginosa* among chronically infected Danish cystic fibrosis patients. *J Cyst Fibros* **7**:391-397.
4. **Seifert H, L Dolzani, R Bressan, T van der Reijden, B van Strijen, D Stefanik, H Heersma, and L Dijkshoorn.** 2005. Standardization and interlaboratory reproducibility assessment of pulsed-field gel electrophoresis-generated fingerprints of *Acinetobacter baumannii*. *J Clin Microbiol* **43**:4328-4335.
5. **Petersson AC, B Olsson-Liljequist, H Miorner, and S Haeggman.** 2010. Evaluating the usefulness of spa typing, in comparison with pulsed-field gel electrophoresis, for epidemiological typing of methicillin-resistant *Staphylococcus aureus* in a low-prevalence region in Sweden 2000-2004. *Clin Microbiol Infect* **16**:456-462.
6. **Saeedi B, A Hallgren, J Jonasson, LE Nilsson, H Hanberger, and B Isaksson.** 2002. Modified pulsed-field gel electrophoresis protocol for typing of enterococci. *APMIS* **110**:869-874.

7. **Saeedi B, A Hallgren, J Jonasson, LE Nilsson, H Hanberger, and B Isaksson.** 2002.

Modified pulsed-field gel electrophoresis protocol for typing of enterococci. *APMIS* **110**:869-

874.
